# Supplementary material for: Volatile Compounds Analysis and Biomarkers Identification of Four Native Apricot (Prunus armeniaca L.) Cultivars Grown in Xinjiang Region of China
Source: MDPI journal article supplement (doi:10.3390/foods11152297), 2022-08-01
Supplement: s1 [file s1]

Supplementary Information for

**Volatile compounds analysis and biomarkers identification of four native apricot (*Prunus armeniaca* L.) cultivars grown in Xinjiang region of China**

Cai Zhao, Jinkui Sun, Xilei Pu, Xuewei Shi, Weidong Cheng, Bin Wang<sup>\*</sup>

Food college, Shihezi University, Shihezi 832000, Xinjiang Uygur Autonomous Region, P. R. China.

\* Corresponding authors

E-mail addresses:

B. W. : binwang0228@shzu.edu.cn.

Tel.: 86-0993-2058093

|                            |   |
|----------------------------|---|
| Supplementary Figures..... | 3 |
| Figure S1. ....            | 3 |
| Figure S2. ....            | 4 |
| Figure S3. ....            | 5 |
| Supplementary Table .....  | 6 |
| Table S1.....              | 7 |

## Supplementary Figures

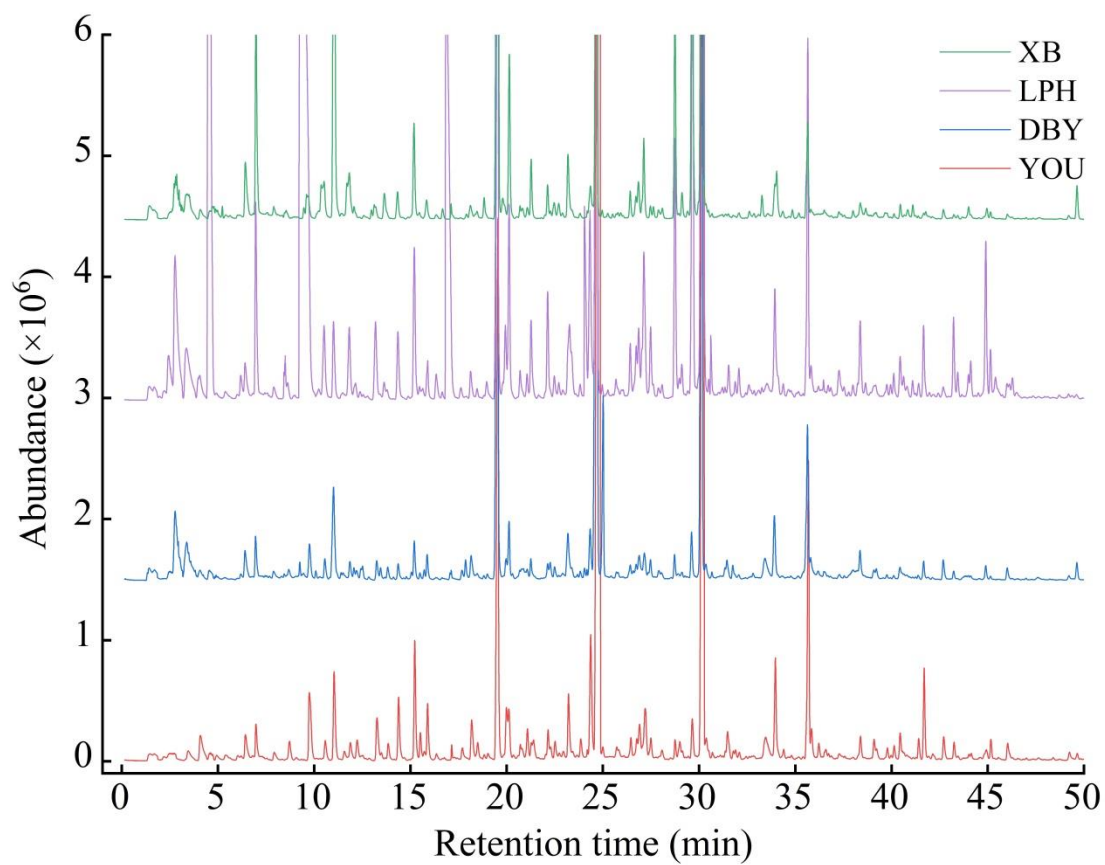

**Figure S1.**

The chromatograms in the HS-SPME-GC-MS/MS analysis of the four apricot cultivars.

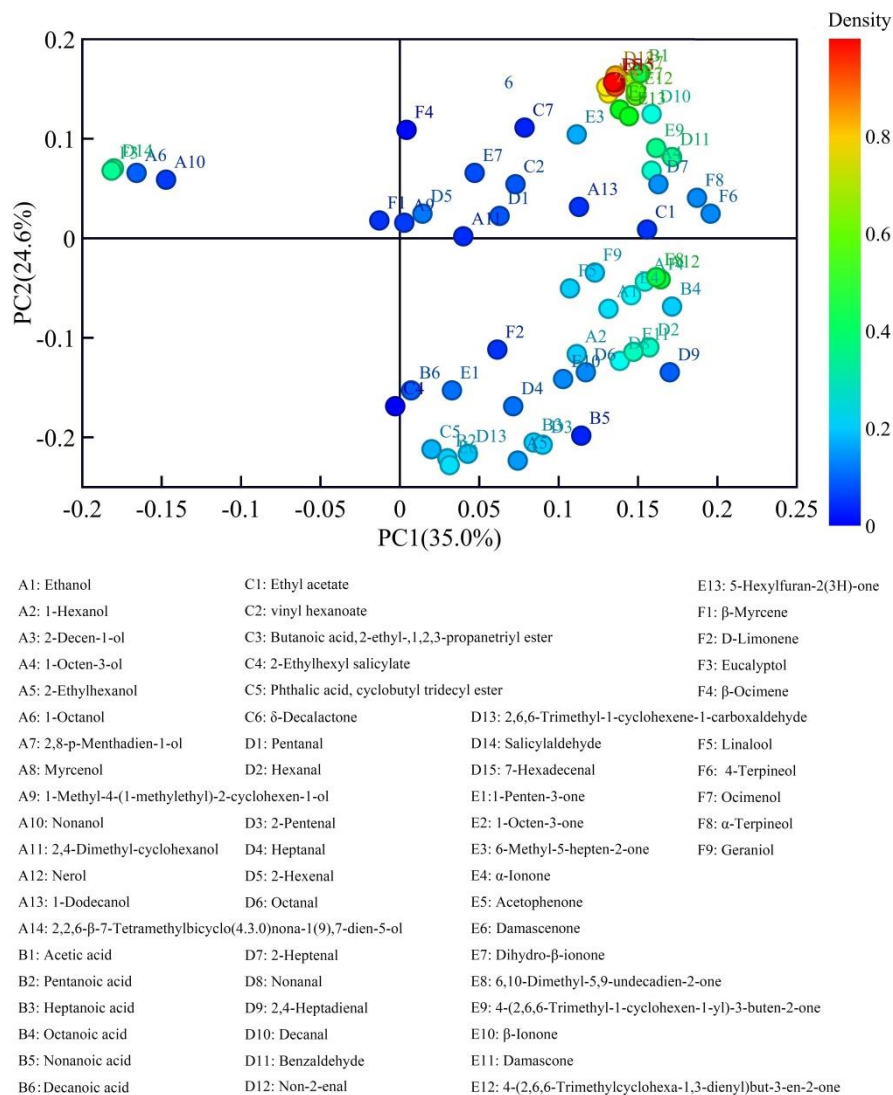

**Figure S2.**

The loading graph of PLS-DA analysis of volatile compounds in four apricot cultivars.

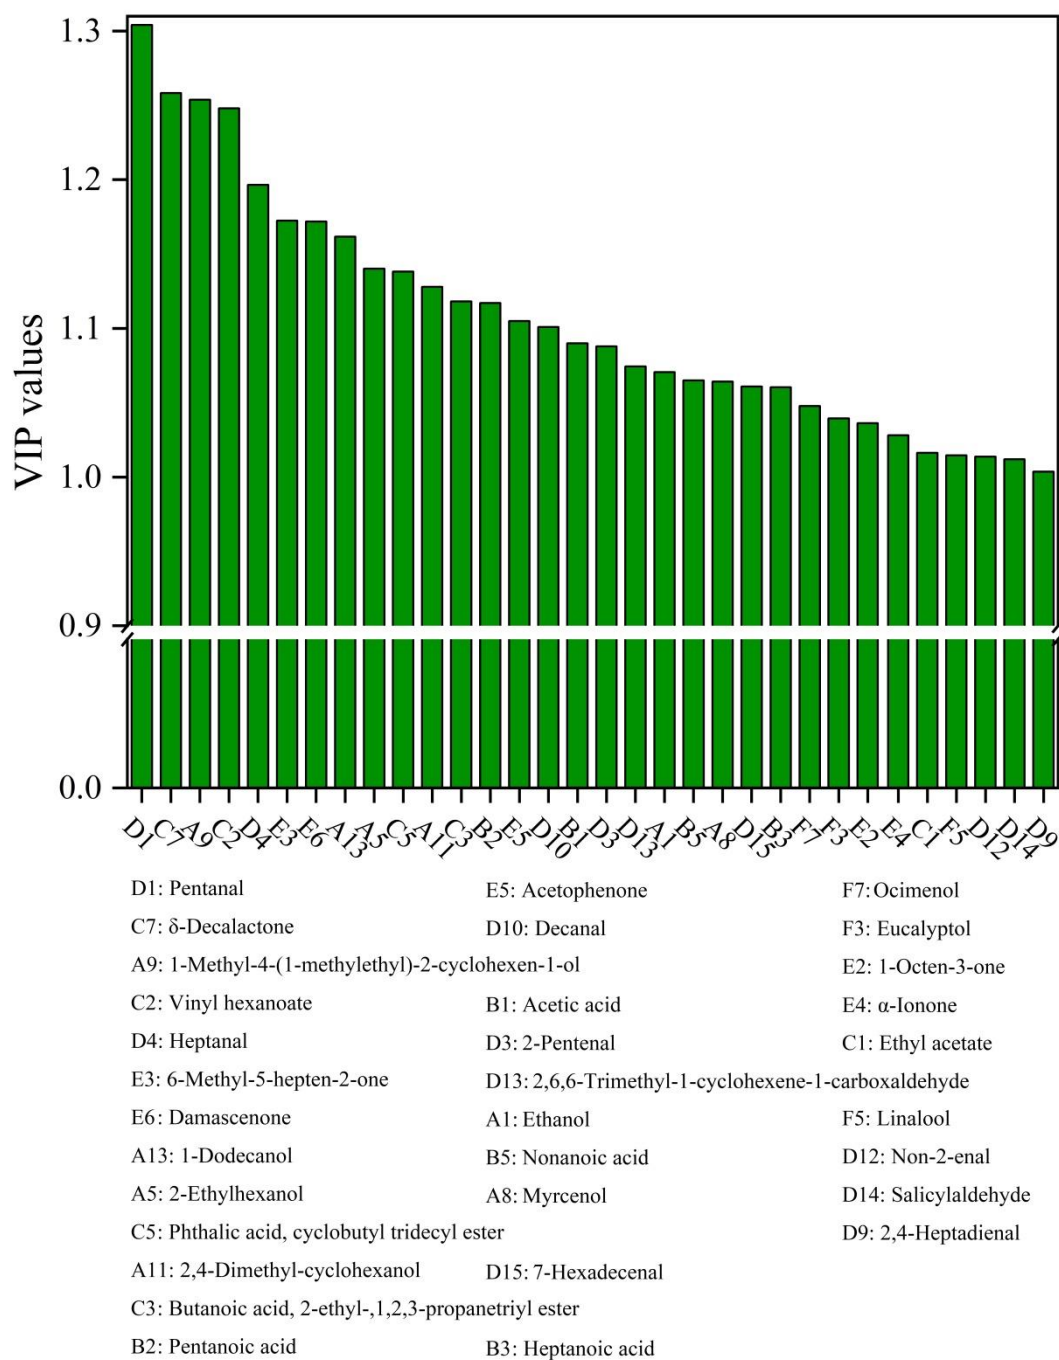

**Figure S3.**

The volatile compounds of VIP>1 in four apricot cultivars.

## **Supplementary Table**

**Table S1.** Concentration of volatile compounds in four apricot cultivars (µg/kg).

| Volatiles<br>categories | Compounds                                                | Apricot cultivars         |                           |                           |                          |
|-------------------------|----------------------------------------------------------|---------------------------|---------------------------|---------------------------|--------------------------|
|                         |                                                          | DBY                       | LPH                       | YOU                       | XB                       |
| Alcohols                | Ethanol                                                  | 13.31 ± 1.90 <sup>a</sup> | 12.30 ± 4.67 <sup>a</sup> | 2.23 ± 0.60 <sup>b</sup>  | 2.86 ± 1.59 <sup>b</sup> |
|                         | 1-Hexanol                                                | 1.64 ± 1.42 <sup>a</sup>  | 0.64 ± 0.57 <sup>a</sup>  | 1.97 ± 0.88 <sup>a</sup>  | nd                       |
|                         | 2-Decen-1-ol                                             | nd                        | 20.48 ± 16.07             | nd                        | nd                       |
|                         | 1-Octen-3-ol                                             | 3.67 ± 3.20               | 9.31 ± 4.93               | nd                        | nd                       |
|                         | 2-Ethylhexanol                                           | 3.59 ± 0.35 <sup>a</sup>  | 0.70 ± 0.13 <sup>b</sup>  | 0.82 ± 0.18 <sup>b</sup>  | nd                       |
|                         | 1-Octanol                                                | nd                        | nd                        | nd                        | 22.51 ± 12.94            |
|                         | 2,8-p-Menthadien-1-ol                                    | nd                        | 17.54 ± 9.61              | 8.58 ± 1.13               | nd                       |
|                         | Myrcenol                                                 | nd                        | 6.91 ± 2.92               | nd                        | nd                       |
|                         | 1-Methyl-4-(1-methylethyl)-2-cyclohexen-1-ol             | nd                        | nd                        | 2.53 ± 1.19               | 0.17 ± 0.18              |
|                         | Nonanol                                                  | nd                        | nd                        | nd                        | 0.11 ± 0.10              |
|                         | 2,4-Dimethyl-cyclohexanol                                | nd                        | nd                        | 20.42 ± 13.81             | nd                       |
|                         | Nerol                                                    | 0.82 ± 0.71 <sup>a</sup>  | 0.98 ± 0.08 <sup>a</sup>  | 1.04 ± 0.45 <sup>a</sup>  | nd                       |
|                         | 1-Dodecanol                                              | 2.95 ± 0.81 <sup>b</sup>  | 5.23 ± 4.86 <sup>b</sup>  | 13.65 ± 3.11 <sup>a</sup> | 0.22 ± 0.31 <sup>b</sup> |
|                         | 2,2,6-β-7-Tetramethylbicyclo(4.3.0)nona-1(9),7-dien-5-ol | 1.22 ± 1.07 <sup>a</sup>  | 1.21 ± 1.05 <sup>a</sup>  | 1.33 ± 0.51 <sup>a</sup>  | nd                       |

**Supplementary Table S1. (continued)**

|           |                                                  |                     |                   |                    |                   |
|-----------|--------------------------------------------------|---------------------|-------------------|--------------------|-------------------|
| Acids     | Acetic acid                                      | nd                  | $3.28 \pm 0.47$   | $1.66 \pm 0.11$    | nd                |
|           | Pentanoic acid                                   | $2.70 \pm 0.82$     | nd                | $0.64 \pm 0.33$    | nd                |
|           | Heptanoic acid                                   | $2.86 \pm 0.47^a$   | $1.06 \pm 0.97^b$ | $0.93 \pm 0.20^b$  | nd                |
|           | Octanoic acid                                    | $5.76 \pm 0.44^a$   | $5.76 \pm 2.68^a$ | $3.37 \pm 1.02^a$  | nd                |
|           | Nonanoic acid                                    | $4.07 \pm 0.66^a$   | $1.30 \pm 0.29^b$ | $2.54 \pm 1.08^b$  | nd                |
|           | Decanoic acid                                    | $1.05 \pm 1.06$     | nd                | $0.45 \pm 0.40$    | nd                |
| Esters    | Ethyl acetate                                    | $15.07 \pm 1.64$    | $21.19 \pm 12.96$ | nd                 | nd                |
|           | Vinyl hexanoate                                  | nd                  | $0.68 \pm 0.63$   | $2.58 \pm 0.41$    | nd                |
|           | Butanoic acid, 2-ethyl-,1,2,3-propanetriyl ester | nd                  | $0.82 \pm 0.15$   | $0.57 \pm 0.09$    | nd                |
|           | 2-Ethylhexyl salicylate                          | $2.69 \pm 2.08^a$   | nd                | $0.30 \pm 0.53^a$  | $0.20 \pm 0.26^a$ |
|           | Phthalic acid, cyclobutyl tridecyl ester         | $1.05 \pm 0.33$     | nd                | nd                 | nd                |
|           | $\delta$ -Decalactone                            | nd                  | $1.41 \pm 0.16^b$ | $2.71 \pm 0.16^a$  | $0.39 \pm 0.02^c$ |
| Aldehydes | Pentanal                                         | $1.79 \pm 0.34^b$   | $4.18 \pm 1.50^b$ | $20.49 \pm 2.42^a$ | nd                |
|           | Hexanal                                          | $2.37 \pm 0.90^a$   | $1.55 \pm 1.48^a$ | $1.31 \pm 0.16^a$  | nd                |
|           | 2-Pentenal                                       | $40.31 \pm 13.09^a$ | $9.81 \pm 4.07^b$ | $6.50 \pm 1.26^b$  | nd                |



**Supplementary Table S1. (continued)**

|         |                                                |                      |                      |                      |                    |
|---------|------------------------------------------------|----------------------|----------------------|----------------------|--------------------|
|         | Heptanal                                       | $6.92 \pm 0.58^a$    | $0.83 \pm 0.73^b$    | $7.64 \pm 1.74^a$    | nd                 |
|         | 2-Hexenal                                      | $14.89 \pm 12.07^a$  | $17.25 \pm 6.50^a$   | $12.99 \pm 4.81^a$   | $18.43 \pm 6.33^a$ |
|         | Octanal                                        | $6.68 \pm 6.72^a$    | $3.22 \pm 0.49^a$    | $5.44 \pm 1.19^a$    | nd                 |
|         | 2-Heptenal                                     | $4.98 \pm 2.41^{ab}$ | $9.57 \pm 4.00^a$    | $2.78 \pm 1.00^b$    | nd                 |
|         | Nonanal                                        | $3.25 \pm 2.82^a$    | $1.98 \pm 0.61^{ab}$ | $1.85 \pm 0.34^{ab}$ | $0.09 \pm 0.10^b$  |
|         | 2,4-Heptadienal                                | $15.34 \pm 3.08^a$   | $11.11 \pm 1.96^b$   | $7.95 \pm 1.18^b$    | $0.18 \pm 0.02^c$  |
|         | Decanal                                        | $1.98 \pm 0.86^b$    | $11.18 \pm 0.34^a$   | $2.80 \pm 0.59^b$    | nd                 |
|         | Benzaldehyde                                   | $1.73 \pm 0.69^b$    | $4.49 \pm 2.72^a$    | $1.03 \pm 0.54^b$    | $0.08 \pm 0.07^b$  |
|         | Non-2-enal                                     | nd                   | $2.54 \pm 1.37^a$    | $0.23 \pm 0.22^b$    | $0.12 \pm 0.12^b$  |
|         | 2,6,6-Trimethyl-1-cyclohexene-1-carboxaldehyde | $25.10 \pm 12.33$    | nd                   | nd                   | $0.09 \pm 0.11$    |
|         | Salicylaldehyde                                | nd                   | nd                   | nd                   | $0.09 \pm 0.03$    |
|         | 7-Hexadecenal                                  | nd                   | $1.28 \pm 0.56$      | nd                   | nd                 |
| Ketones | 1-Penten-3-one                                 | $0.69 \pm 0.60^a$    | nd                   | $0.79 \pm 0.16^a$    | $0.22 \pm 0.39^a$  |
|         | 1-Octen-3-one                                  | $0.36 \pm 0.42^b$    | $8.51 \pm 3.08^a$    | $7.73 \pm 2.91^a$    | nd                 |
|         | 6-Methyl-5-hepten-2-one                        | nd                   | $3.74 \pm 1.57^b$    | $6.61 \pm 1.51^a$    | $0.23 \pm 0.07^c$  |
|         | $\alpha$ -Ionone                               | $4.11 \pm 2.17$      | $4.29 \pm 1.41$      | nd                   | nd                 |

**Supplementary Table S1. (continued)**

|          |                                                       |                              |                             |                              |                          |
|----------|-------------------------------------------------------|------------------------------|-----------------------------|------------------------------|--------------------------|
|          | Acetophenone                                          | nd                           | 1.21 ± 0.35                 | nd                           | nd                       |
|          | Damascenone                                           | 1.18 ± 0.12                  | nd                          | nd                           | nd                       |
|          | Dihydro-β-ionone                                      | nd                           | 7.52 ± 11.57                | 1.23 ± 0.26                  | nd                       |
|          | 6,10-Dimethyl-5,9-undecadien-2-one                    | 2.96 ± 1.24 <sup>a</sup>     | 3.25 ± 0.36 <sup>a</sup>    | 4.56 ± 2.65 <sup>a</sup>     | 0.07 ± 0.02 <sup>b</sup> |
|          | 4-(2,6,6-Trimethyl-1-cyclohexen-1-yl)-3-buten-2-one   | 0.79 ± 0.70 <sup>a</sup>     | 2.5 ± 1.51 <sup>a</sup>     | 0.57 ± 0.60 <sup>a</sup>     | nd                       |
|          | β-Ionone                                              | 4.78 ± 2.08 <sup>a</sup>     | 2.95 ± 3.44 <sup>a</sup>    | 2.34 ± 0.64 <sup>a</sup>     | nd                       |
|          | Damascone                                             | 3.50 ± 1.62 <sup>a</sup>     | 2.96 ± 1.49 <sup>a</sup>    | 2.10 ± 0.57 <sup>ab</sup>    | 0.22 ± 0.23 <sup>b</sup> |
|          | 4-(2,6,6-Trimethylcyclohexa-1,3-dienyl)but-3-en-2-one | nd                           | 3.81 ± 2.60                 | 3.21 ± 1.20                  | nd                       |
|          | 5-Hexylfuran-2(3H)-one                                | 2.54 ± 0.27 <sup>b</sup>     | 15.33 ± 9.90 <sup>a</sup>   | 1.12 ± 1.10 <sup>b</sup>     | nd                       |
| Terpenes | β-Myrcene                                             | 2.49 ± 0.62 <sup>a</sup>     | 2.47 ± 0.97 <sup>a</sup>    | 4.50 ± 2.63 <sup>a</sup>     | 4.03 ± 4.04 <sup>a</sup> |
|          | D-Limonene                                            | 5.06 ± 5.26 <sup>a</sup>     | nd                          | 8.01 ± 7.23 <sup>a</sup>     | 0.33 ± 0.48 <sup>a</sup> |
|          | Eucalyptol                                            | nd                           | nd                          | nd                           | 0.26 ± 0.05              |
|          | β-Ocimene                                             | nd                           | 0.74 ± 0.04 <sup>a</sup>    | 1.41 ± 0.84 <sup>a</sup>     | 0.80 ± 0.94 <sup>a</sup> |
|          | Linalool                                              | 291.25 ± 13.88 <sup>ab</sup> | 195.74 ± 94.71 <sup>b</sup> | 600.22 ± 390.09 <sup>a</sup> | 2.39 ± 2.10 <sup>b</sup> |
|          | 4-Terpineol                                           | 2.89 ± 1.04 <sup>a</sup>     | 4.72 ± 1.77 <sup>a</sup>    | 3.43 ± 2.20 <sup>a</sup>     | nd                       |
|          | Ocimenol                                              | 4.08 ± 1.58 <sup>b</sup>     | 57.14 ± 22.68 <sup>a</sup>  | 5.11 ± 3.55 <sup>b</sup>     | 0.12 ± 0.05 <sup>b</sup> |

**Supplementary Table S1. (continued)**

|                     |                         |                       |                       |                   |
|---------------------|-------------------------|-----------------------|-----------------------|-------------------|
| $\alpha$ -Terpineol | $198.42 \pm 32.41^{ab}$ | $364.88 \pm 157.96^a$ | $305.33 \pm 212.07^a$ | $0.22 \pm 0.38^b$ |
| Geraniol            | $34.55 \pm 1.66^a$      | $28.69 \pm 26.74^a$   | $66.08 \pm 46.49^a$   | nd                |

Notes: Values were presented as mean  $\pm$  standard deviation (n=3). nd= not detected.

The different superscripts in the column meant significant differences ( $P < 0.05$ , Duncan's test) for different apricot cultivars.
